# Supplementary material for: Rhesus macaques vaccinated with consensus envelopes elicit partially protective immune responses against SHIV SF162p4 challenge
Source: PubMed Central journal article supplement (PMC3637437; doi:10.1186/1743-422x-10-102), 2013-04-02
Supplement: 1743-422X-10-102-S1.pdf [file 1743-422X-10-102-S1.pdf]

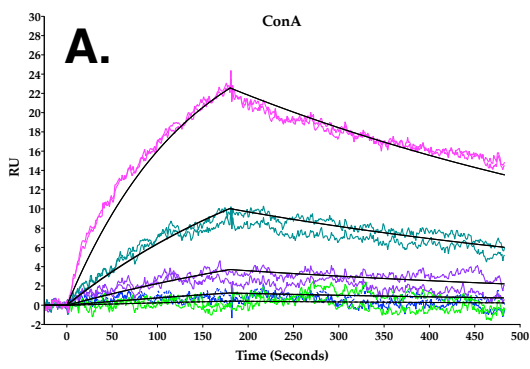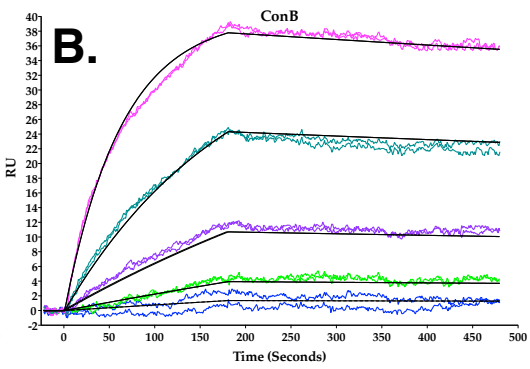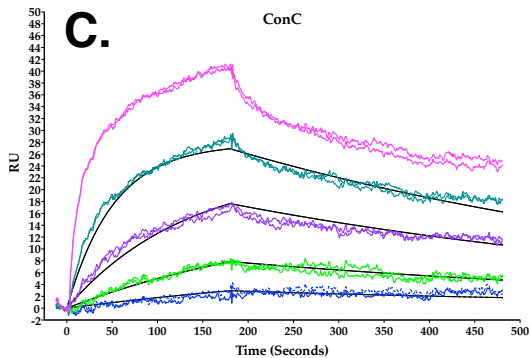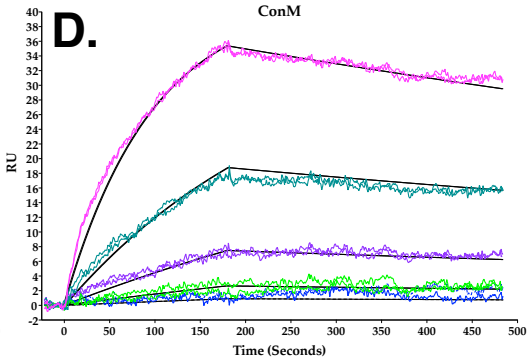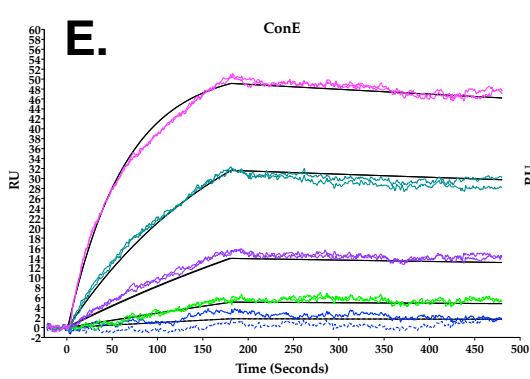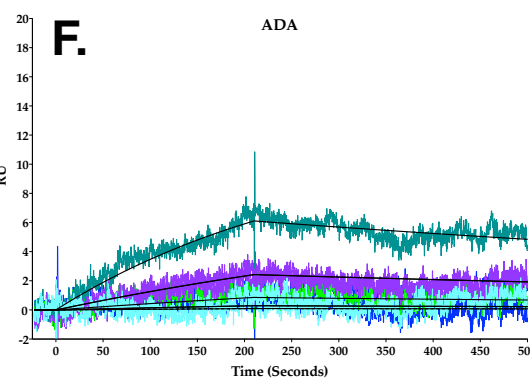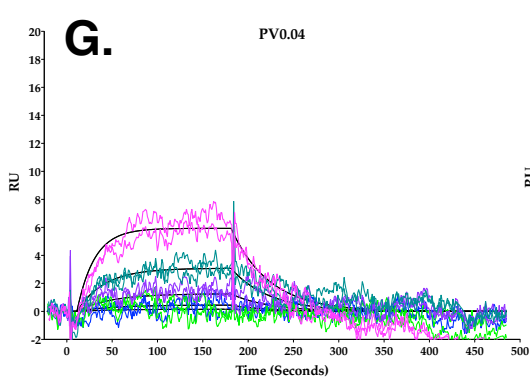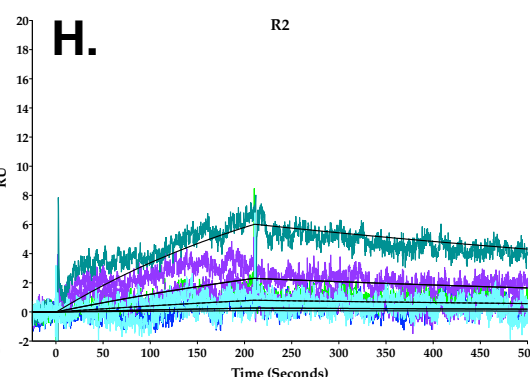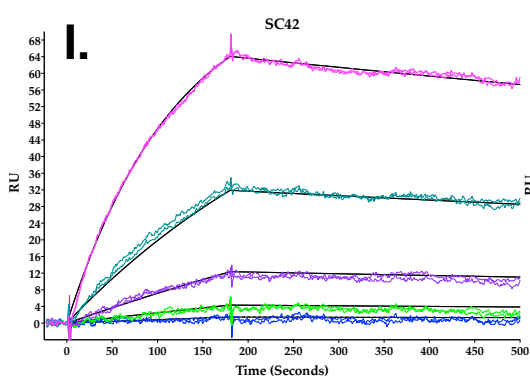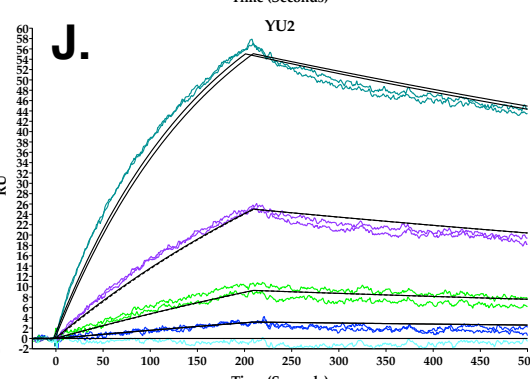

— 0.272nM — 0.815nM — 2.44nM — 7.33nM — 22nM — 66nM
